# Supplementary material for: Clinical Impact of Next-Generation Sequencing Multi-Gene Panel Highlighting the Landscape of Germline Alterations in Ovarian Cancer Patients
Source: MDPI journal article supplement (doi:10.3390/ijms232415789), 2022-12-13
Supplement: s1 [file s1]

**Supplementary Table S1.** List of the 34 heterozygous *BRCA1/2* pathogenic/likely-pathogenic variants identified in the case series.

| Patient ID | 1 <sup>st</sup> cancer | Age at onset | 2 <sup>nd</sup> cancer | Age at onset | Gene         | Exon | DNA (HGVS)*    | Protein (HGVS)**    | Variant type         | IARC class | dbSNP        | ClinVar/Other databases |
|------------|------------------------|--------------|------------------------|--------------|--------------|------|----------------|---------------------|----------------------|------------|--------------|-------------------------|
| A125       | BC                     | 48           | OC                     | 50           | <i>BRCA2</i> | 23   | c.9097dupA     | p.Thr3033AsnfsTer11 | frameshift insertion | 5          | rs397507419  | pathogenic              |
| A284       | OC                     | 49           | -                      | -            | <i>BRCA1</i> | 20   | c.5266dupC     | p.Gln1756ProfsTer74 | frameshift insertion | 5          | rs80357906   | pathogenic              |
| A643       | BC                     | 66           | OC                     | 70           | <i>BRCA2</i> | 11   | c.3897_3901del | p.Glu1299AspfsTer7  | frameshift deletion  | 4          | -            | -                       |
| A793       | BC                     | 54           | OC                     | 67           | <i>BRCA2</i> | 11   | c.3847_3848del | p.Val1283LysfsTer2  | frameshift deletion  | 5          | rs80359405   | pathogenic              |
| A835       | BC                     | 40           | OC                     | 61           | <i>BRCA1</i> | 14   | c.4484G>T      | p.Arg1495Met        | missense variant     | 5          | rs80357389   | pathogenic              |
| A882       | OC                     | 55           | -                      | -            | <i>BRCA1</i> | 11   | c.4035delC     | p.Glu1346LysfsTer20 | frameshift deletion  | 5          | rs80357711   | pathogenic              |
| A884       | BC                     | 52           | OC                     | 60           | <i>BRCA2</i> | 11   | c.3743_3746del | p.Ser1248ArgfsTer10 | frameshift deletion  | 5          | rs80359403   | pathogenic              |
| A891       | OC                     | 64           | -                      | -            | <i>BRCA1</i> | 11   | c.1513A>T      | p.Lys505Ter         | nonsense variant     | 5          | rs397508877  | pathogenic              |
| A899       | OC                     | 61           | BC                     | 66           | <i>BRCA2</i> | 16   | c.7618-2A>G    | p.?                 | splicing variant     | 5          | rs886040940  | pathogenic              |
| A922       | BC                     | 42           | OC                     | 66           | <i>BRCA2</i> | 11   | c.6468_6469del | p.Gln2157IlefsTer18 | frameshift deletion  | 5          | rs80359596   | pathogenic              |
| A938       | BC                     | 46           | OC                     | 52           | <i>BRCA1</i> | 8    | c.529delT      | p.Ser177LeufsTer57  | frameshift deletion  | 5          | rs80357758   | pathogenic              |
| B160       | OC                     | 66           | -                      | -            | <i>BRCA2</i> | 11   | c.4889C>G      | p.Ser1630Ter        | nonsense variant     | 5          | rs80358711   | pathogenic              |
| B165       | OC                     | 74           | -                      | -            | <i>BRCA2</i> | 14   | c.7180A>T      | p.Arg2394Ter        | nonsense variant     | 5          | rs80358946   | pathogenic              |
| B166       | BC                     | 71           | OC                     | 71           | <i>BRCA1</i> | 11   | c.3748G>T      | p.Glu1250Ter        | nonsense variant     | 5          | rs28897686   | pathogenic              |
| B215       | OC                     | 66           | RCC                    | 65           | <i>BRCA2</i> | 11   | c.5868dupT     | p.Ile1957TyrfsTer3  | frameshift insertion | 4          | -            | -                       |
| B220       | OC                     | 51           | -                      | -            | <i>BRCA2</i> | 13   | c.6998dupT     | p.Pro2334ThrfsTer6  | frameshift insertion | 5          | rs754611265  | pathogenic              |
| B245       | OC                     | 57           | -                      | -            | <i>BRCA1</i> | 11   | c.3700_3704del | p.Val1234GlnfsTer8  | frameshift deletion  | 5          | rs80357609   | pathogenic              |
| B270       | OC                     | 56           | -                      | -            | <i>BRCA1</i> | 10   | c.615dupA      | p.Gln206ThrfsTer10  | frameshift insertion | 4          | rs1567803215 | VUS/likely-pathogenic   |
| B294       | OC                     | 64           | -                      | -            | <i>BRCA2</i> | 11   | c.3046G>T      | p.Glu1016Ter        | nonsense variant     | 5          | rs748508287  | pathogenic              |
| B295       | OC                     | 57           | -                      | -            | <i>BRCA2</i> | 10   | c.1813delA     | p.Ile605TyrfsTer9   | frameshift deletion  | 5          | rs80359306   | pathogenic              |
| B319       | OC                     | 53           | -                      | -            | <i>BRCA1</i> | 24   | c.5503C>T      | p.Arg1835Ter        | nonsense variant     | 5          | rs41293465   | pathogenic              |
| B336       | OC                     | 63           | -                      | -            | <i>BRCA2</i> | 11   | c.6037A>T      | p.Lys2013Ter        | nonsense variant     | 5          | rs80358840   | pathogenic              |

|      |    |    |    |    |       |    |                |                     |                      |   |             |            |
|------|----|----|----|----|-------|----|----------------|---------------------|----------------------|---|-------------|------------|
| B351 | OC | 65 | -  | -  | BRCA2 | 11 | c.4284dupT     | p.Gln1429SerfsTer9  | frameshift insertion | 5 | rs80359439  | pathogenic |
| B359 | OC | 49 | -  | -  | BRCA1 | 14 | c.4484G>T      | p.Arg1495Met        | missense variant     | 5 | rs80357389  | pathogenic |
| B363 | OC | 49 | -  | -  | BRCA1 | 24 | c.5468-1G>A    | p.?                 | splicing variant     | 5 | rs80358048  | pathogenic |
| B365 | OC | 54 | -  | -  | BRCA1 | 11 | c.850C>T       | p.Gln284Ter         | nonsense variant     | 5 | rs397509330 | pathogenic |
| B372 | OC | 52 | -  | -  | BRCA1 | 11 | c.850C>T       | p.Gln284Ter         | nonsense variant     | 5 | rs397509330 | pathogenic |
| B404 | OC | 76 | -  | -  | BRCA2 | 11 | c.2905C>T      | p.Gln969Ter         | nonsense variant     | 5 | rs886038080 | pathogenic |
| B409 | BC | 35 | OC | 58 | BRCA2 | 11 | c.2684delC     | p.Ala895ValfsTer9   | frameshift deletion  | 5 | rs80359342  | pathogenic |
| B413 | OC | 58 | -  | -  | BRCA2 | 11 | c.4284dupT     | p.Gln1429SerfsTer9  | frameshift insertion | 5 | rs80359439  | pathogenic |
| B418 | OC | 61 | -  | -  | BRCA1 | 14 | c.4484G>T      | p.Arg1495Met        | missense variant     | 5 | rs80357389  | pathogenic |
| B465 | OC | 69 | -  | -  | BRCA2 | 11 | c.2684delC     | p.Ala895ValfsTer9   | frameshift deletion  | 5 | rs80359342  | pathogenic |
| B519 | OC | 77 | -  | -  | BRCA2 | 27 | c.9871del      | p.Ser3291LeufsTer22 | frameshift deletion  | 5 | rs886040854 | pathogenic |
| B682 | OC | 64 | -  | -  | BRCA2 | 11 | c.3847_3848del | p.Val1283LysfsTer2  | frameshift deletion  | 5 | rs80359405  | pathogenic |

OC: ovarian cancer

BC: breast cancer

RCC: renal cell carcinoma

VUS: variant of uncertain significance

\* *BRCA1* transcript: NM\_007294.4; *BRCA2* transcript: NM\_000059.4

\*\* *BRCA1* protein: NP\_009225.1; *BRCA2* protein: NP\_000050.3

**Supplementary Table S2.** List of the 38 heterozygous pathogenic/likely-pathogenic variants in genes other than *BRCA1/2* identified in the case series.

| Patient ID | 1 <sup>st</sup> cancer | Age at onset | 2 <sup>nd</sup> cancer | Age at onset | <i>BRCA1/2</i> status | Gene          | Transcript | Exon | DNA (HGVS)       | Protein (HGVS)     | Variant type         | IARC class | dbSNP        | ClinVar     |
|------------|------------------------|--------------|------------------------|--------------|-----------------------|---------------|------------|------|------------------|--------------------|----------------------|------------|--------------|-------------|
| A284       | OC                     | 49           | -                      | -            | <i>BRCA1</i> +        | <i>ERCC3</i>  | NM_000122  | 11   | c.1757delA       | p.Gln586ArgfsTer25 | frameshift deletion  | 5          | rs753182861  | pathogenic  |
| A893       | OC                     | 52           | -                      | -            | wt                    | <i>PPM1D</i>  | NM_003620  | 6    | c.1535dupA       | p.Asn512LysfsTer16 | frameshift insertion | 4          | rs763475304  | -           |
| A906       | OC                     | 50           | -                      | -            | wt                    | <i>SBDS</i>   | NM_016038  | 2    | c.258+2T>C       | p.?                | splicing variant     | 5          | rs113993993  | pathogenic  |
| A912       | OC                     | 74           | -                      | -            | wt                    | <i>PPM1D</i>  | NM_003620  | 6    | c.1426G>T        | p.Glu476Ter        | nonsense variant     | 4          | rs1296018768 | -           |
| A913       | OC                     | 64           | -                      | -            | wt                    | <i>PPM1D</i>  | NM_003620  | 6    | c.1654C>T        | p.Arg552Ter        | nonsense variant     | 5          | rs779070661  | pathogenic  |
| A916       | NET                    | 69           | OC                     | 73           | wt                    | <i>BRIP1</i>  | NM_032043  | 9    | c.1201_1204dup   | p.Ala402ValfsTer21 | frameshift insertion | 5          | rs730881647  | pathogenic  |
| A917       | OC                     | 59           | -                      | -            | wt                    | <i>PPM1D</i>  | NM_003620  | 6    | c.1273delG       | p.Asp425IlefsTer6  | frameshift deletion  | 4          | -            | -           |
| A918       | OC                     | 54           | -                      | -            | wt                    | <i>BRIP1</i>  | NM_032043  | 8    | c.1018_1019insCT | p.Leu340ProfsTer9  | frameshift insertion | 5          | rs878855134  | pathogenic  |
| A939       | OC                     | 75           | -                      | -            | wt                    | <i>TP53</i>   | NM_000546  | 8    | c.817C>T         | p.Arg273Cys        | missense variant     | 5          | rs121913343  | pathogenic  |
| A944       | OC                     | 65           | -                      | -            | wt                    | <i>PPM1D</i>  | NM_003620  | 6    | c.1654C>T        | p.Arg552Ter        | nonsense variant     | 5          | rs779070661  | pathogenic  |
| B144       | OC                     | 47           | -                      | -            | wt                    | <i>MUTYH</i>  | NM_012222  | 12   | c.1162C>T        | p.Gln388Ter        | nonsense variant     | 5          | rs587783057  | pathogenic  |
| B167       | OC                     | 54           | -                      | -            | wt                    | <i>MUTYH</i>  | NM_012222  | 13   | c.1178G>A        | p.Gly393Asp        | missense variant     | 5          | rs36053993   | pathogenic  |
| B184       | OC                     | 77           | -                      | -            | wt                    | <i>EGFR</i>   | NM_005228  | 7    | c.844G>T         | p.Glu282Ter        | nonsense variant     | 4          | -            | -           |
|            |                        |              |                        |              |                       | <i>CHEK2</i>  | NM_007194  | 11   | c.1232G>A        | p.Trp411Ter        | nonsense variant     | 5          | rs371418985  | pathogenic  |
| B204       | OC                     | 79           | -                      | -            | wt                    | <i>PPM1D</i>  | NM_003620  | 6    | c.1281G>A        | p.Trp427Ter        | nonsense variant     | 5          | rs1064797099 | pathogenic  |
| B205       | OC                     | 39           | -                      | -            | wt                    | <i>ALK</i>    | NM_004304  | 16   | c.2782dupT       | p.Cys928LeufsTer20 | frameshift insertion | 4          | rs1218092221 | -           |
| B220       | OC                     | 51           | -                      | -            | <i>BRCA2</i> +        | <i>HOXB13</i> | NM_006361  | 1    | c.251G>A         | p.Gly84Glu         | missense variant     | 4          | rs138213197  | conflicting |
| B243       | OC                     | 75           | -                      | -            | wt                    | <i>RECQL4</i> | NM_004260  | 15   | c.2300delT       | p.Val767GlyfsTer76 | frameshift deletion  | 4          | rs752895803  | -           |
| B303       | OC                     | 56           | -                      | -            | wt                    | <i>RAD51C</i> | NM_058216  | 7    | c.905-2_905-1del | p.?                | splicing variant     | 5          | rs587781995  | pathogenic  |
| B330       | OC                     | 70           | -                      | -            | wt                    | <i>MITF</i>   | NM_000248  | 9    | c.952G>A         | p.Glu318Lys        | missense variant     | 5          | rs149617956  | pathogenic  |
| B336       | OC                     | 63           | -                      | -            | <i>BRCA2</i> +        | <i>PPM1D</i>  | NM_003620  | 6    | c.1465delT       | p.Ser489LeufsTer2  | frameshift deletion  | 4          | -            | -           |
| B357       | OC                     | 85           | -                      | -            | wt                    | <i>PRF1</i>   | NM_005041  | 2    | c.160C>T         | p.Arg54Cys         | missense variant     | 5          | rs200430442  | pathogenic  |
| B391       | OC                     | 46           | -                      | -            | wt                    | <i>MITF</i>   | NM_000248  | 9    | c.952G>A         | p.Glu318Lys        | missense variant     | 5          | rs149617956  | pathogenic  |

|      |    |    |    |    |               |               |           |    |                  |                     |                      |   |              |                   |
|------|----|----|----|----|---------------|---------------|-----------|----|------------------|---------------------|----------------------|---|--------------|-------------------|
| B406 | OC | 69 | -  | -  | wt            | <i>PALB2</i>  | NM_024675 | 4  | c.1140_1143del   | p.Ser380ArgfsTer43  | frameshift deletion  | 5 | rs1257545151 | pathogenic        |
| B419 | OC | 73 | -  | -  | wt            | <i>ERCC2</i>  | NM_000400 | 21 | c.2005_2006del   | p.Arg669GlyfsTer104 | frameshift deletion  | 4 | rs757535186  | -                 |
| B421 | OC | 40 | -  | -  | wt            | <i>ALK</i>    | NM_004304 | 16 | c.2782dupT       | p.Cys928LeufsTer20  | frameshift insertion | 4 | rs1218092221 | -                 |
|      |    |    |    |    |               | <i>FANCD2</i> | NM_033084 | 35 | c.3541C>T        | p.Gln1181Ter        | nonsense variant     | 5 | -            | pathogenic        |
| B426 | OC | 78 | -  | -  | wt            | <i>RAD51C</i> | NM_058216 | 1  | c.93delG         | p.Phe32SerfsTer8    | frameshift deletion  | 5 | rs730881942  | pathogenic        |
| B458 | OC | 76 | -  | -  | wt            | <i>ERCC5</i>  | NM_000123 | 15 | c.3285_3294del   | p.Ser1096AspfsTer12 | frameshift deletion  | 4 | -            | -                 |
| B476 | TC | 26 | OC | 45 | wt            | <i>MUTYH</i>  | NM_012222 | 7  | c.527A>G         | p.Tyr176Cys         | missense variant     | 5 | rs34612342   | pathogenic        |
| B513 | OC | 54 | -  | -  | wt            | <i>RAD51C</i> | NM_058216 | 7  | c.905-2_905-1del | p.?                 | splicing variant     | 5 | rs587781995  | pathogenic        |
| B519 | OC | 77 | -  | -  | <i>BRCA2+</i> | <i>MSH2</i>   | NM_000251 | 5  | c.942+2delT      | p.?                 | splicing variant     | 4 | rs587779194  | likely-pathogenic |
| B542 | OC | 82 | -  | -  | wt            | <i>PPM1D</i>  | NM_003620 | 6  | c.1654C>T        | p.Arg552Ter         | nonsense variant     | 5 | rs779070661  | pathogenic        |
| B571 | OC | 51 | -  | -  | wt            | <i>FANCL</i>  | NM_018062 | 14 | c.1096_1099dup   | p.Thr367AsnfsTer13  | frameshift insertion | 4 | rs759217526  | conflicting       |
| B612 | OC | 78 | -  | -  | wt            | <i>CHEK2</i>  | NM_007194 | 4  | c.514dupA        | p.Thr172AsnfsTer14  | frameshift insertion | 5 | rs1601823546 | pathogenic        |
| B618 | OC | 68 | -  | -  | wt            | <i>MUTYH</i>  | NM_012222 | 13 | c.1178G>A        | p.Gly393Asp         | missense variant     | 5 | rs36053993   | pathogenic        |
| B693 | OC | 43 | -  | -  | wt            | <i>MLH1</i>   | NM_000249 | 12 | c.1039-1G>C      | p.?                 | splicing variant     | 4 | rs267607819  | likely-pathogenic |
| B697 | OC | 54 | -  | -  | wt            | <i>MITF</i>   | NM_000248 | 9  | c.952G>A         | p.Glu318Lys         | missense variant     | 5 | rs149617956  | pathogenic        |

OC: ovarian cancer

NET: neuroendocrine tumor

TC: thyroid cancer

**Supplementary Table S3.** Levels of neutrophils, lymphocytes, platelets, NLR, PLR, SII before treatment initiation and mutational status.

|                                | <i>BRCA1+</i> (n=14) | <i>BRCA2+</i> (n=20) | Other genes (n=32) | wt (n=153)         | Total (n=219)      | <i>P</i> |
|--------------------------------|----------------------|----------------------|--------------------|--------------------|--------------------|----------|
| <b>Neutrophil counts</b>       |                      |                      |                    |                    |                    | 0.347    |
| Median                         | 3310                 | 4200                 | 3510               | 4150               | 4115               |          |
| [IQ range]                     | [2230 - 5010]        | [2950 - 5730]        | [2390 - 4945]      | [2880 - 5620]      | [2770 - 5440]      |          |
| Min - max                      | 1430 - 11300         | 2560 - 12970         | 1600 - 14300       | 1960 - 11450       | 1430 - 14300       |          |
| missing                        | 4                    | 9                    | 12                 | 64                 | 89                 |          |
| <b>Lymphocyte counts</b>       |                      |                      |                    |                    |                    | 0.261    |
| Median                         | 1350                 | 1480                 | 1530               | 1645               | 1585               |          |
| [IQ range]                     | [945 - 1855]         | [1280 - 1660]        | [1320 - 1950]      | [1365 - 1995]      | [1330 - 1920]      |          |
| Min - max                      | 178 - 2120           | 690 - 2150           | 1010 - 3760        | 260 - 3200         | 178 - 3760         |          |
| missing                        | 6                    | 9                    | 13                 | 73                 | 101                |          |
| <b>Platelet counts</b>         |                      |                      |                    |                    |                    | 0.986    |
| Median                         | 339                  | 331                  | 325.5              | 306                | 319                |          |
| [IQ range]                     | [172 - 403]          | [231 - 488]          | [276 - 391.5]      | [255 - 404]        | [256 - 410]        |          |
| Min - max                      | 133 - 927            | 199 - 569            | 96 - 693           | 176 - 853          | 96 - 927           |          |
| missing                        | 4                    | 9                    | 12                 | 64                 | 89                 |          |
| <b>NLR</b>                     |                      |                      |                    |                    |                    | 0.156    |
| Median                         | 3.22                 | 2.82                 | 2.03               | 2.52               | 2.46               |          |
| [IQ range]                     | [2.12 - 5.20]        | [1.87 - 4.50]        | [1.51 - 3.28]      | [1.66 - 3.42]      | [1.71 - 3.39]      |          |
| Min - max                      | 1.72 - 8.03          | 1.63 - 13.23         | 0.75 - 10.51       | 0.92 - 15.16       | 0.75 - 15.16       |          |
| missing                        | 6                    | 9                    | 13                 | 73                 | 101                |          |
| <b>PLR</b>                     |                      |                      |                    |                    |                    | 0.360    |
| Median                         | 0.30                 | 0.26                 | 0.19               | 0.19               | 0.20               |          |
| [IQ range]                     | [0.16 - 0.43]        | [0.16 - 0.31]        | [0.14 - 0.28]      | [0.14 - 0.24]      | [0.14 - 0.28]      |          |
| Min - max                      | 0.10 - 0.74          | 0.13 - 0.70          | 0.05 - 0.58        | 0.07 - 0.99        | 0.05 - 0.99        |          |
| missing                        | 6                    | 9                    | 13                 | 73                 | 101                |          |
| <b>SII</b>                     |                      |                      |                    |                    |                    | 0.437    |
| Median                         | 970.33               | 1029                 | 540.79             | 774.97             | 738.55             |          |
| [IQ range]                     | [640.57 - 1109.37]   | [441.69 - 2077.55]   | [357.45 - 1431.96] | [429.32 - 1315.99] | [432.34 - 1348.58] |          |
| Min - max                      | 133 - 927            | 408.86 - 4380.68     | 216.12 - 3701.18   | 197.75 - 7488.41   | 197.75 - 7488.41   |          |
| missing                        | 6                    | 9                    | 13                 | 73                 | 101                |          |
| <b>Dichotomized NLR, n (%)</b> |                      |                      |                    |                    |                    | 0.067    |
| < 2.46                         | 2 (25.00)            | 4 (36.36)            | 14 (73.68)         | 39 (48.75)         | 59 (50.00)         |          |

|                                      |           |           |            |            |             |              |
|--------------------------------------|-----------|-----------|------------|------------|-------------|--------------|
| ≥ 2.46                               | 6 (75.00) | 7 (63.64) | 5 (26.32)  | 41 (51.25) | 59 (50.00)  |              |
| missing                              | 6         | 9         | 13         | 73         | 101         |              |
| <b>Dichotomized PLR, n (%)</b>       |           |           |            |            |             | <b>0.864</b> |
| < 0.20                               | 3 (37.50) | 5 (45.45) | 10 (52.63) | 42 (52.50) | 60 (50.85)  |              |
| ≥ 0.20                               | 5 (62.50) | 6 (54.55) | 9 (47.37)  | 38 (47.50) | 58 (49.15)  |              |
| missing                              | 6         | 9         | 13         | 73         | 101         |              |
| <b>Dichotomized SII, n (%)</b>       |           |           |            |            |             | <b>0.268</b> |
| < 738.54                             | 3 (37.50) | 4 (36.36) | 13 (68.42) | 39 (48.75) | 59 (50.00)  |              |
| ≥ 738.54                             | 5 (62.50) | 7 (63.64) | 6 (31.58)  | 41 (51.25) | 59 (50.00)  |              |
| missing                              | 6         | 9         | 13         | 73         | 101         |              |
| <b>Dichotomized platelets, n (%)</b> |           |           |            |            |             | <b>0.361</b> |
| ≤ 450                                | 8 (80.00) | 7 (63.64) | 18 (90.00) | 73 (82.02) | 106 (81.54) |              |
| > 450                                | 2 (20.00) | 4 (36.36) | 2 (10.00)  | 16 (17.98) | 24 (18.46)  |              |
| missing                              | 4         | 9         | 12         | 63         | 89          |              |

NLR: neutrophil-to-lymphocyte ratio

PLR: platelet-to-lymphocyte ratio

SII: systemic immune-inflammation index

**Supplementary Table S4.** Association between platinum sensitivity and histology in our case series.

|                                                 | Serous high-grade (n=162) | Endometrioid (n=16)    | Other (n=41)             | Total (n=219)            | <i>P</i> |
|-------------------------------------------------|---------------------------|------------------------|--------------------------|--------------------------|----------|
| <b>Platinum sensitivity, months<sup>§</sup></b> |                           |                        |                          |                          | 0.210    |
| Median<br>[IQ range]                            | 22.39<br>[10.40 – 42.82]  | 19.09<br>[8.71 – 38.3] | 37.73<br>[14.85 – 48.52] | 24.15<br>[10.61 – 43.50] |          |
| Min - max                                       | 0 – 124.74                | 0.16 – 128.81          | 0.62 – 329.4             | 0 – 329.4                |          |
| missing                                         | 10                        | 1                      | 15                       | 26                       |          |

<sup>§</sup>Time from the date of the end of platinum-based chemotherapy until the date of relapse or death from any cause.

**Supplementary Table S5.** List of the 94 genes included in the Trusight Cancer panel

| Genes        |               |                |               |               |                |               |              |               |               |
|--------------|---------------|----------------|---------------|---------------|----------------|---------------|--------------|---------------|---------------|
| <i>AIP</i>   | <i>ALK</i>    | <i>APC</i>     | <i>ATM</i>    | <i>BAP1</i>   | <i>BLM</i>     | <i>BMPR1A</i> | <i>BRCA1</i> | <i>BRCA2</i>  | <i>BRIP1</i>  |
| <i>BUB1B</i> | <i>CDC73</i>  | <i>CDH1</i>    | <i>CDK4</i>   | <i>CDKN1C</i> | <i>CDKN2A</i>  | <i>CEBPA</i>  | <i>CEP57</i> | <i>CHEK2</i>  | <i>CYLD</i>   |
| <i>DDB2</i>  | <i>DICER1</i> | <i>DIS3L2</i>  | <i>EGFR</i>   | <i>EPCAM</i>  | <i>ERCC2</i>   | <i>ERCC3</i>  | <i>ERCC4</i> | <i>ERCC5</i>  | <i>EXT1</i>   |
| <i>EXT2</i>  | <i>EZH2</i>   | <i>FANCA</i>   | <i>FANCB</i>  | <i>FANCC</i>  | <i>FANCD2</i>  | <i>FANCE</i>  | <i>FANCF</i> | <i>FANCG</i>  | <i>FANCI</i>  |
| <i>FANCL</i> | <i>FANCM</i>  | <i>FH</i>      | <i>FLCN</i>   | <i>GATA2</i>  | <i>GPC3</i>    | <i>HNFI1A</i> | <i>HRAS</i>  | <i>KIT</i>    | <i>MAX</i>    |
| <i>MEN1</i>  | <i>MET</i>    | <i>MLH1</i>    | <i>MSH2</i>   | <i>MSH6</i>   | <i>MUTYH</i>   | <i>NBN</i>    | <i>NF1</i>   | <i>NF2</i>    | <i>NSD1</i>   |
| <i>PALB2</i> | <i>PHOX2B</i> | <i>PMS1</i>    | <i>PMS2</i>   | <i>PRF1</i>   | <i>PRKAR1A</i> | <i>PTCH1</i>  | <i>PTEN</i>  | <i>RAD51C</i> | <i>RAD51D</i> |
| <i>RB1</i>   | <i>RECQL4</i> | <i>RET</i>     | <i>RHBDF2</i> | <i>RUNX1</i>  | <i>SBDS</i>    | <i>SDHAF2</i> | <i>SDHB</i>  | <i>SDHC</i>   | <i>SDHD</i>   |
| <i>SLX4</i>  | <i>SMAD4</i>  | <i>SMARCB1</i> | <i>STK11</i>  | <i>SUFU</i>   | <i>TMEM127</i> | <i>TP53</i>   | <i>TSC1</i>  | <i>TSC2</i>   | <i>VHL</i>    |
| <i>WRN</i>   | <i>WT1</i>    | <i>XPA</i>     | <i>XPC</i>    |               |                |               |              |               |               |
